# Supplementary material for: Morphometric Changes to Corneal Dendritic Cells in Individuals With Mild Cognitive Impairment
Source: PubMed Central journal article supplement (PMC7755610; doi:10.3389/fnins.2020.556137), 2020-12-09
Supplement: Data_Sheet_1.pdf [file Data_Sheet_1.pdf]

## *Supplementary Material*

**Figure S1. Representative IVCM images of the central corneal region, for each study participant.**

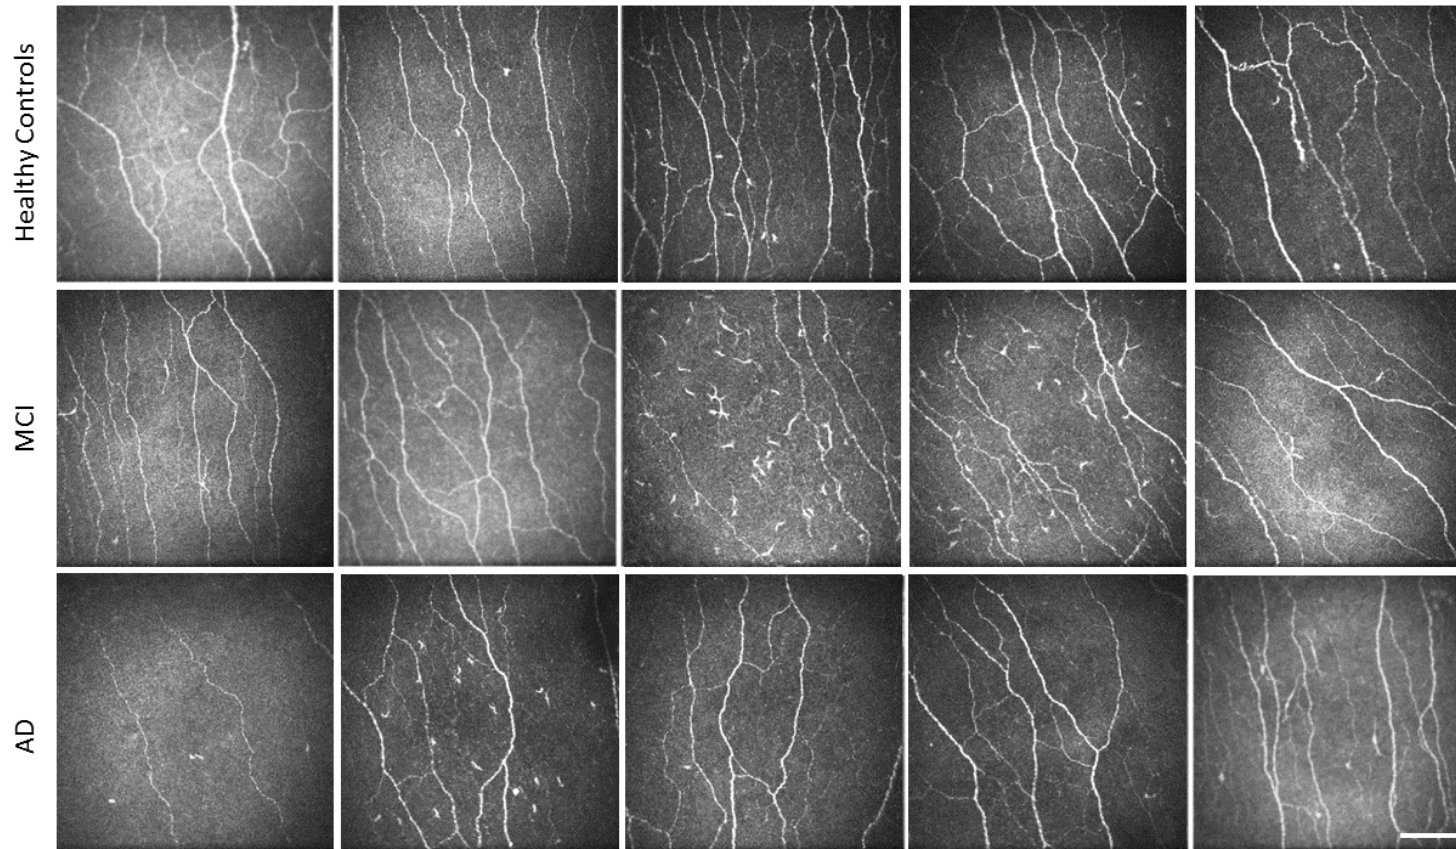

Representative central corneal IVCM images for each study participant, for healthy control (upper row, n=5), MCI (middle row, n=5) and AD (lower row, n=5) participants. Scale bar = 100 $\mu$ m and applies to all images.

Figure S2. Additional central corneal dendritic cell parameters

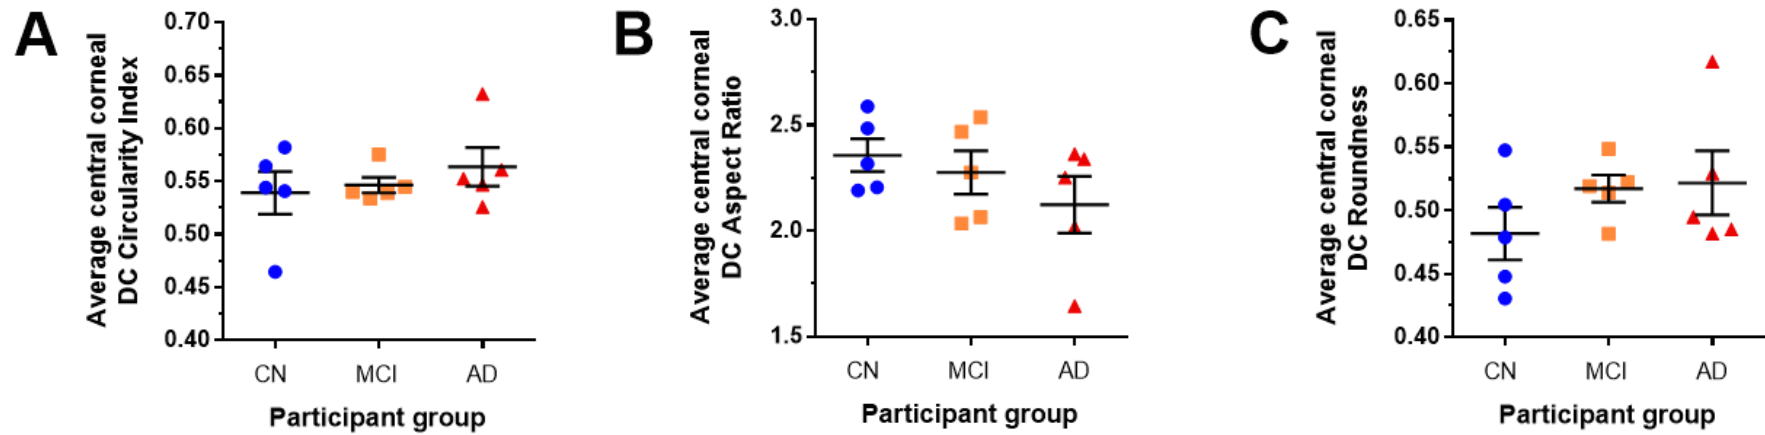

Central corneal DCs had a similar shape with respect to circularity (A), aspect ratio (B) and roundness (C) in cognitive normal (CN), mild cognitive impairment (MCI) and Alzheimer's disease (AD) participants; none of the comparisons were statistically significant ( $p > 0.05$  for all comparisons).

**Figure S3. Representative IVCM images of the corneal inferior whorl region, for each study participant.**

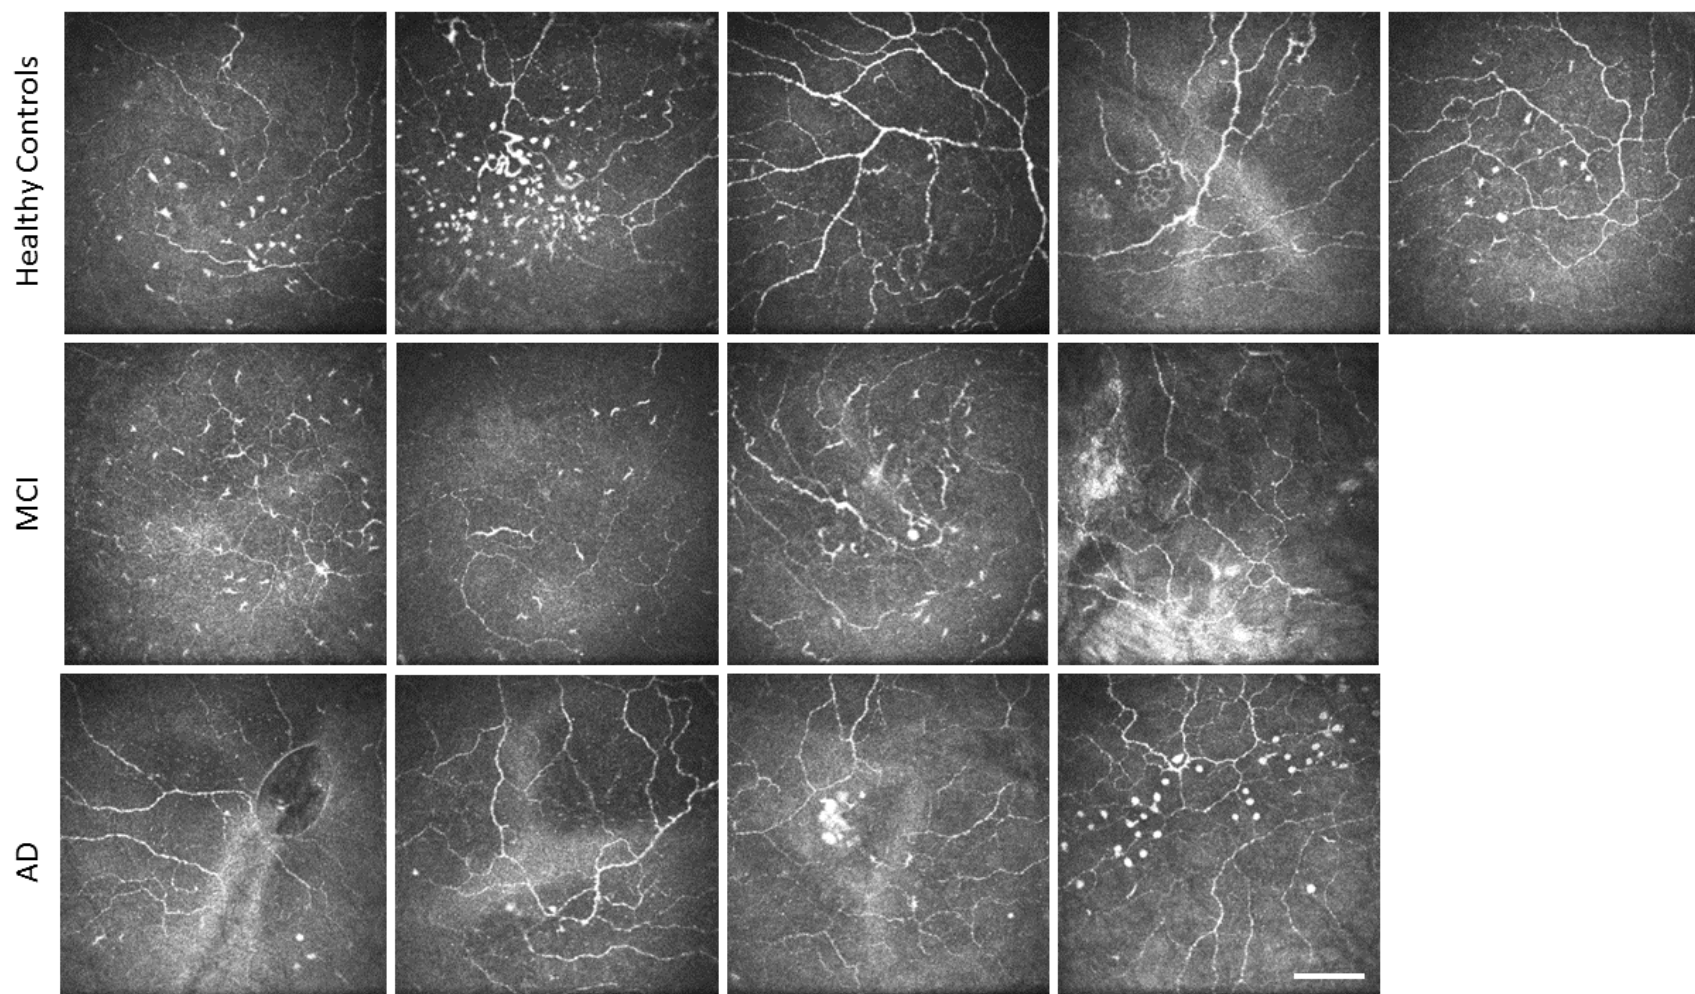

Representative corneal IVCM images of the inferior whorl region for each study participant, for healthy control (upper row, n=5), MCI (middle row, n=4) and AD (lower row, n=4) participants. Scale bar = 100 $\mu$ m and applies to all images.

**Table S1. Summary of participants' concomitant medications**

| <b>MEDICATION CATEGORY</b>                           | <b>CN<br/>(n=5)</b> | <b>MCI<br/>(n=5)</b> | <b>AD<br/>(n=5)</b> |
|------------------------------------------------------|---------------------|----------------------|---------------------|
| <b>Alimentary</b>                                    |                     |                      |                     |
| - Anti-diarrhoeal                                    | -                   | 1                    | -                   |
| - Hyperacidity, reflex and ulcers                    | 3                   | 2                    | 1                   |
| <b>Anti-infective</b>                                |                     |                      |                     |
| - Combination anti-viral (hepatitis C)               | -                   | 1                    | -                   |
| <b>Cardiovascular</b>                                |                     |                      |                     |
| - Anti-coagulant                                     | 2                   | 2                    | 3                   |
| - Anti-hypertensive                                  | 2                   | 4                    | 3                   |
| - Hypolipidaemic                                     | -                   | 2                    | 2                   |
| <b>CNS agents</b>                                    |                     |                      |                     |
| - Antidepressant                                     | -                   | -                    | 1                   |
| - Anticovulsant                                      | -                   | 1                    | 1                   |
| - Cholinesterase inhibitor                           | -                   | -                    | 4                   |
| - Sedatives/hypnotics                                | -                   | -                    | -                   |
| <b>Endocrine and metabolic</b>                       |                     |                      |                     |
| - Agents affecting calcium and bone metabolism       | -                   | -                    | -                   |
| - Gonadal hormones                                   | 1                   | -                    | 1                   |
| <b>Genitourinary</b>                                 | 1                   | 1                    |                     |
| <b>Musculoskeletal</b>                               |                     |                      |                     |
| - Agent for gout or hyperuricaemia                   | -                   | 1                    | 1                   |
| - Muscle relaxant                                    | -                   | 2                    | -                   |
| - NSAID                                              | -                   | 2                    | 3                   |
| - Simple analgesic                                   | -                   | 1                    | 2                   |
| <b>Respiratory</b>                                   |                     |                      |                     |
| - Preventative aerosols and inhalations              | -                   | 1                    | 1                   |
| <b>Vitamin supplements / complementary medicines</b> |                     |                      |                     |
| - Curcumin                                           | -                   | 1                    | -                   |
| - Ginkgo biloba                                      | 1                   | 1                    | 1                   |
| - Glucosamine                                        | 2                   | -                    | 2                   |

|                       |   |   |   |
|-----------------------|---|---|---|
| - Magnesium           | 1 | - | 2 |
| - Multivitamin        | 2 | - | - |
| - Omega-3 fatty acids | 1 | - | - |
| - Souvanaid           | - | 1 | 4 |
| - Vitamin B12         | - | - | 1 |
| - Vitamin C           | 1 | - | - |
| - Vitamin D           | 3 | - | 1 |

Data are presented counts for each categorical variable.

Legend: AD, Alzheimer's disease; CN, cognitive normal; CNS, central nervous system; MCI, mild cognitive impairment; NSAID, non-steroidal anti-inflammatory drug
